# Supplementary material for: Application of HPLC Combined with UPLC–Orbitrap–MS in Chemical Characterization, Quantitative Detection, and Species Authentication of Four Panax-derived Products
Source: Research Square preprint supplement (doi:10.21203/rs.3.rs-7772424/v1), 2025-10-20
Supplement: Supplementary file 1 [file a743b66f0aff4c76575e6d08.docx]

**Supplementary Materials**

**Tables and figures of Contents for Supporting Information**

Xingwang Leng **1,** †, Sicheng Wang 2**,** †, Anqi Wang **1**, Bin Li **1**, Lidong Cheng **3**, Yixing Qiu **1**, Jisheng Liu **1**, Jiao Cui **4**, Xiaoping Nie **4**, Wei Wang **1**, Xueli Bai 2, Hanwen Yuan **1,** *, Caiyun Peng **1,** *

1TCM and Ethnomedicine Innovation & Development International Laboratory, School of Pharmacy, Hunan University of Chinese Medicine, Changsha, China

2The First Affiliated Hospital, School of Medicine, Zhejiang University, Hangzhou, Zhejiang, China;

3Hunan Yirentang Chinese Herbal Pieces Co., Ltd., Changsha, China

**4**The Second Affiliated Hospital of Hunan University of Chinese Medicine, Changsha, China

†These authors contributed equally to this work

* Correspondence: [Hanwyuan@hnucm.edu.cn](mailto:Hanwyuan@hnucm.edu.cn) (H. Yuan), [Caiyunpeng @hnucm.edu.cn](mailto:002142@hnucm.edu.com) (C. Peng);

**SUPPORTING FIGURES AND TABLES**

**Fig.S1** Characteristic fingerprint for XYS.

**Fig.S2** Characteristic fingerprint for RS.

**Fig.S3** Characteristic fingerprint for SQ.

**Fig.S4** Characteristic fingerprint for BSQ.

**Fig. S5** Fingerprint and characteristic spectrum of SQ , BSQ , RS , XYS.

**Fig.S6** The MS2 spectrum of some compounds in Four Panax species. .**a**:Protopanaxadiol，**b**:Protopanaxatriol, **c**:Oleanolic acid,**d**:Octillol,**e**:C17 side-chain varied.

**Table S1** Souce information of SQ , BSQ, XYS, RS.

**Table S2** Method validation of HPLC fingerprint analysis.

**Table S3** Similarity in fingerprints of XYS.

**Table S4** Similarity in fingerprints of RS.

**Table S5** Similarity in fingerprints of SQ.

**Table S6** Similarity in fingerprints of BSQ.

**Table S7** Content of 13 Compounds in Four Panax Medicinal Herbs

**
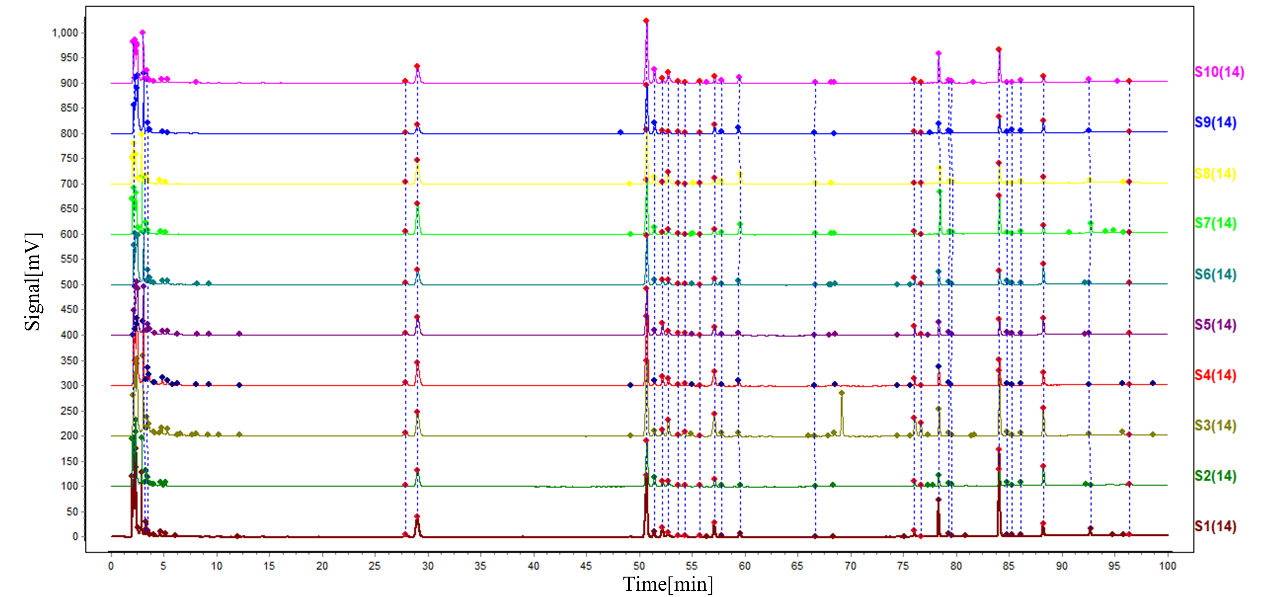
**

**Fig.S1** Characteristic fingerprint for XYS.

**
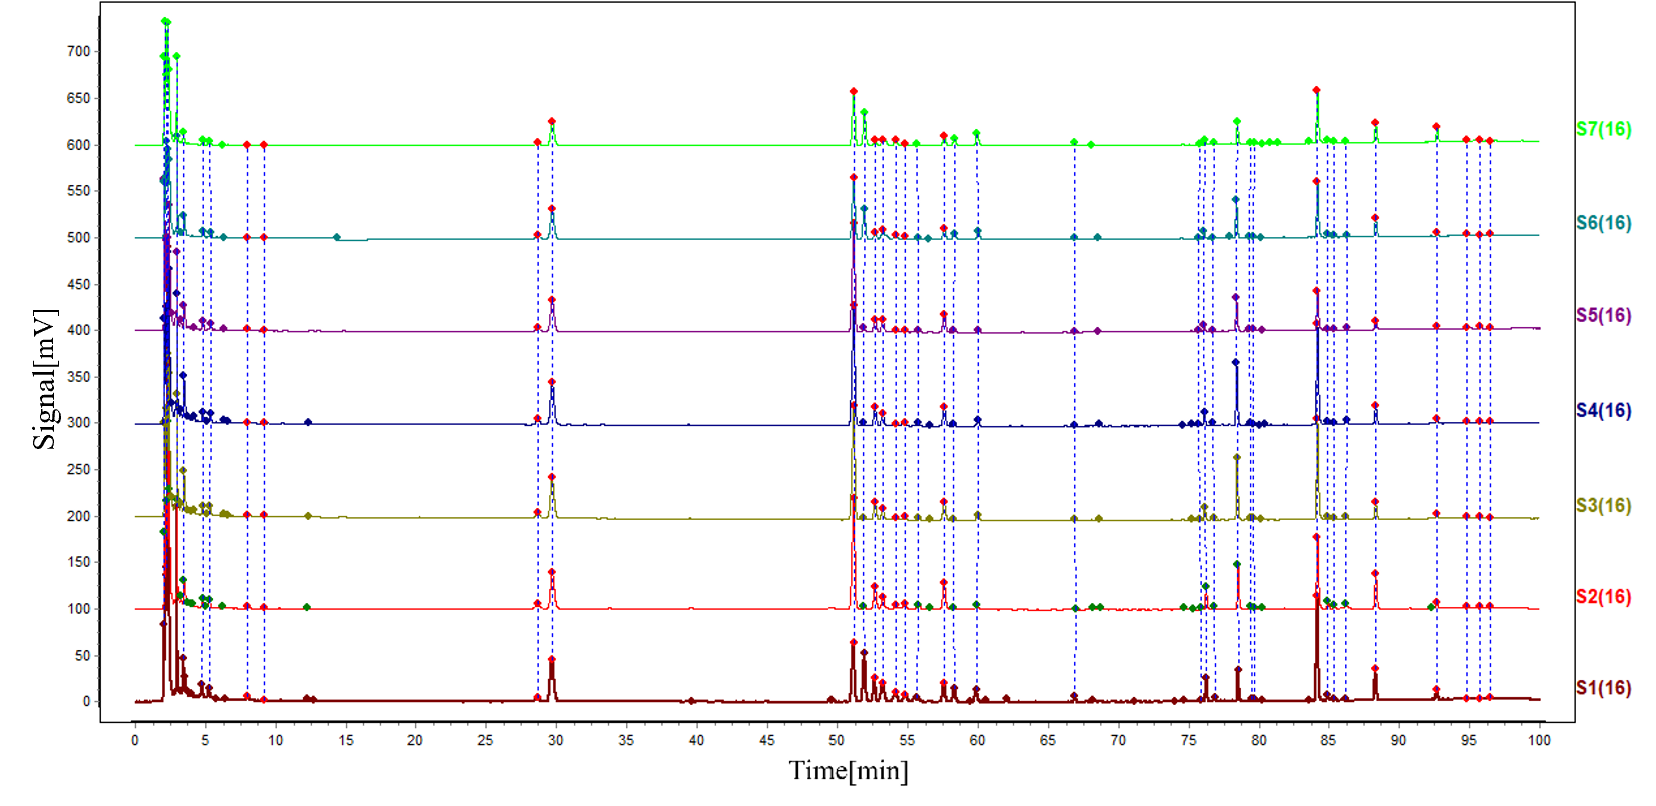
**

**Fig.S2** Characteristic fingerprint for RS.


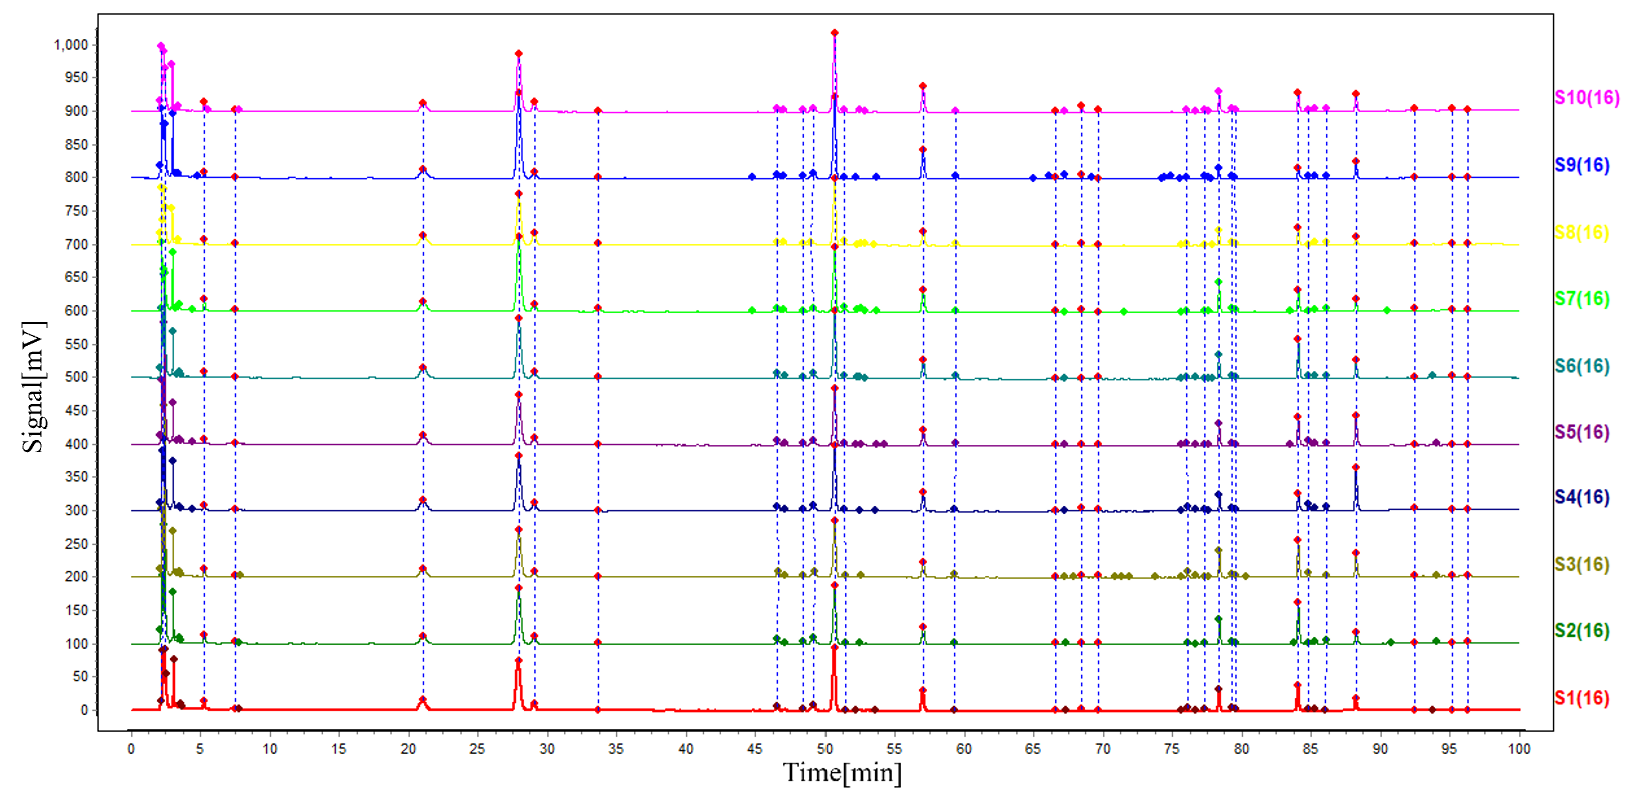


**Fig.S3** Characteristic fingerprint for SQ.


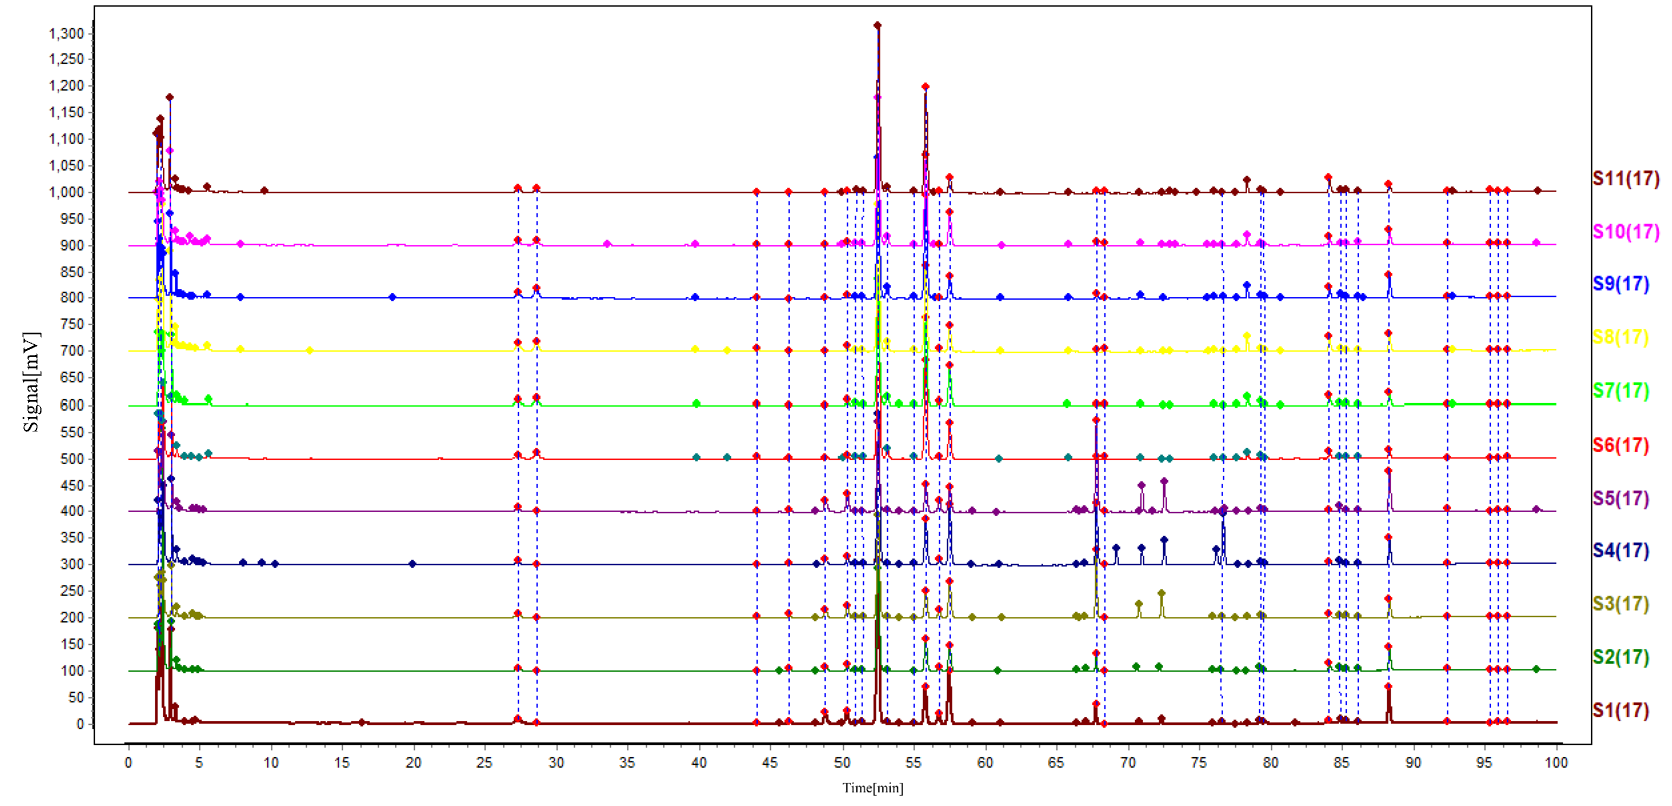


**Fig.S4** Characteristic fingerprint for BSQ.


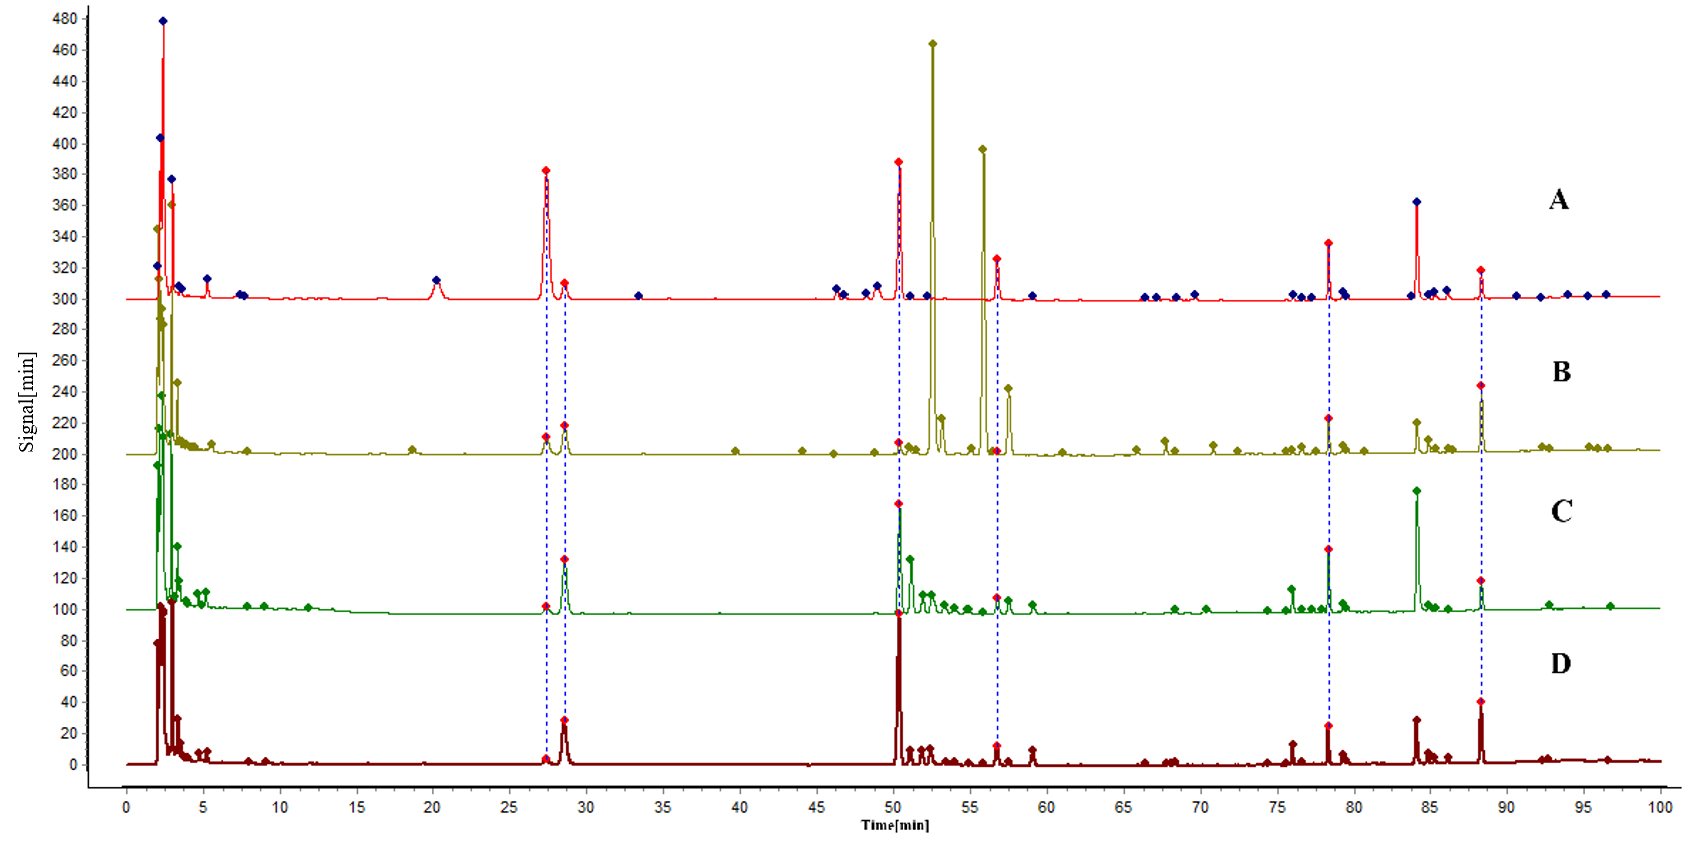


**Fig. S5** Fingerprint and characteristic spectrum of SQ , BSQ , RS , XYS.


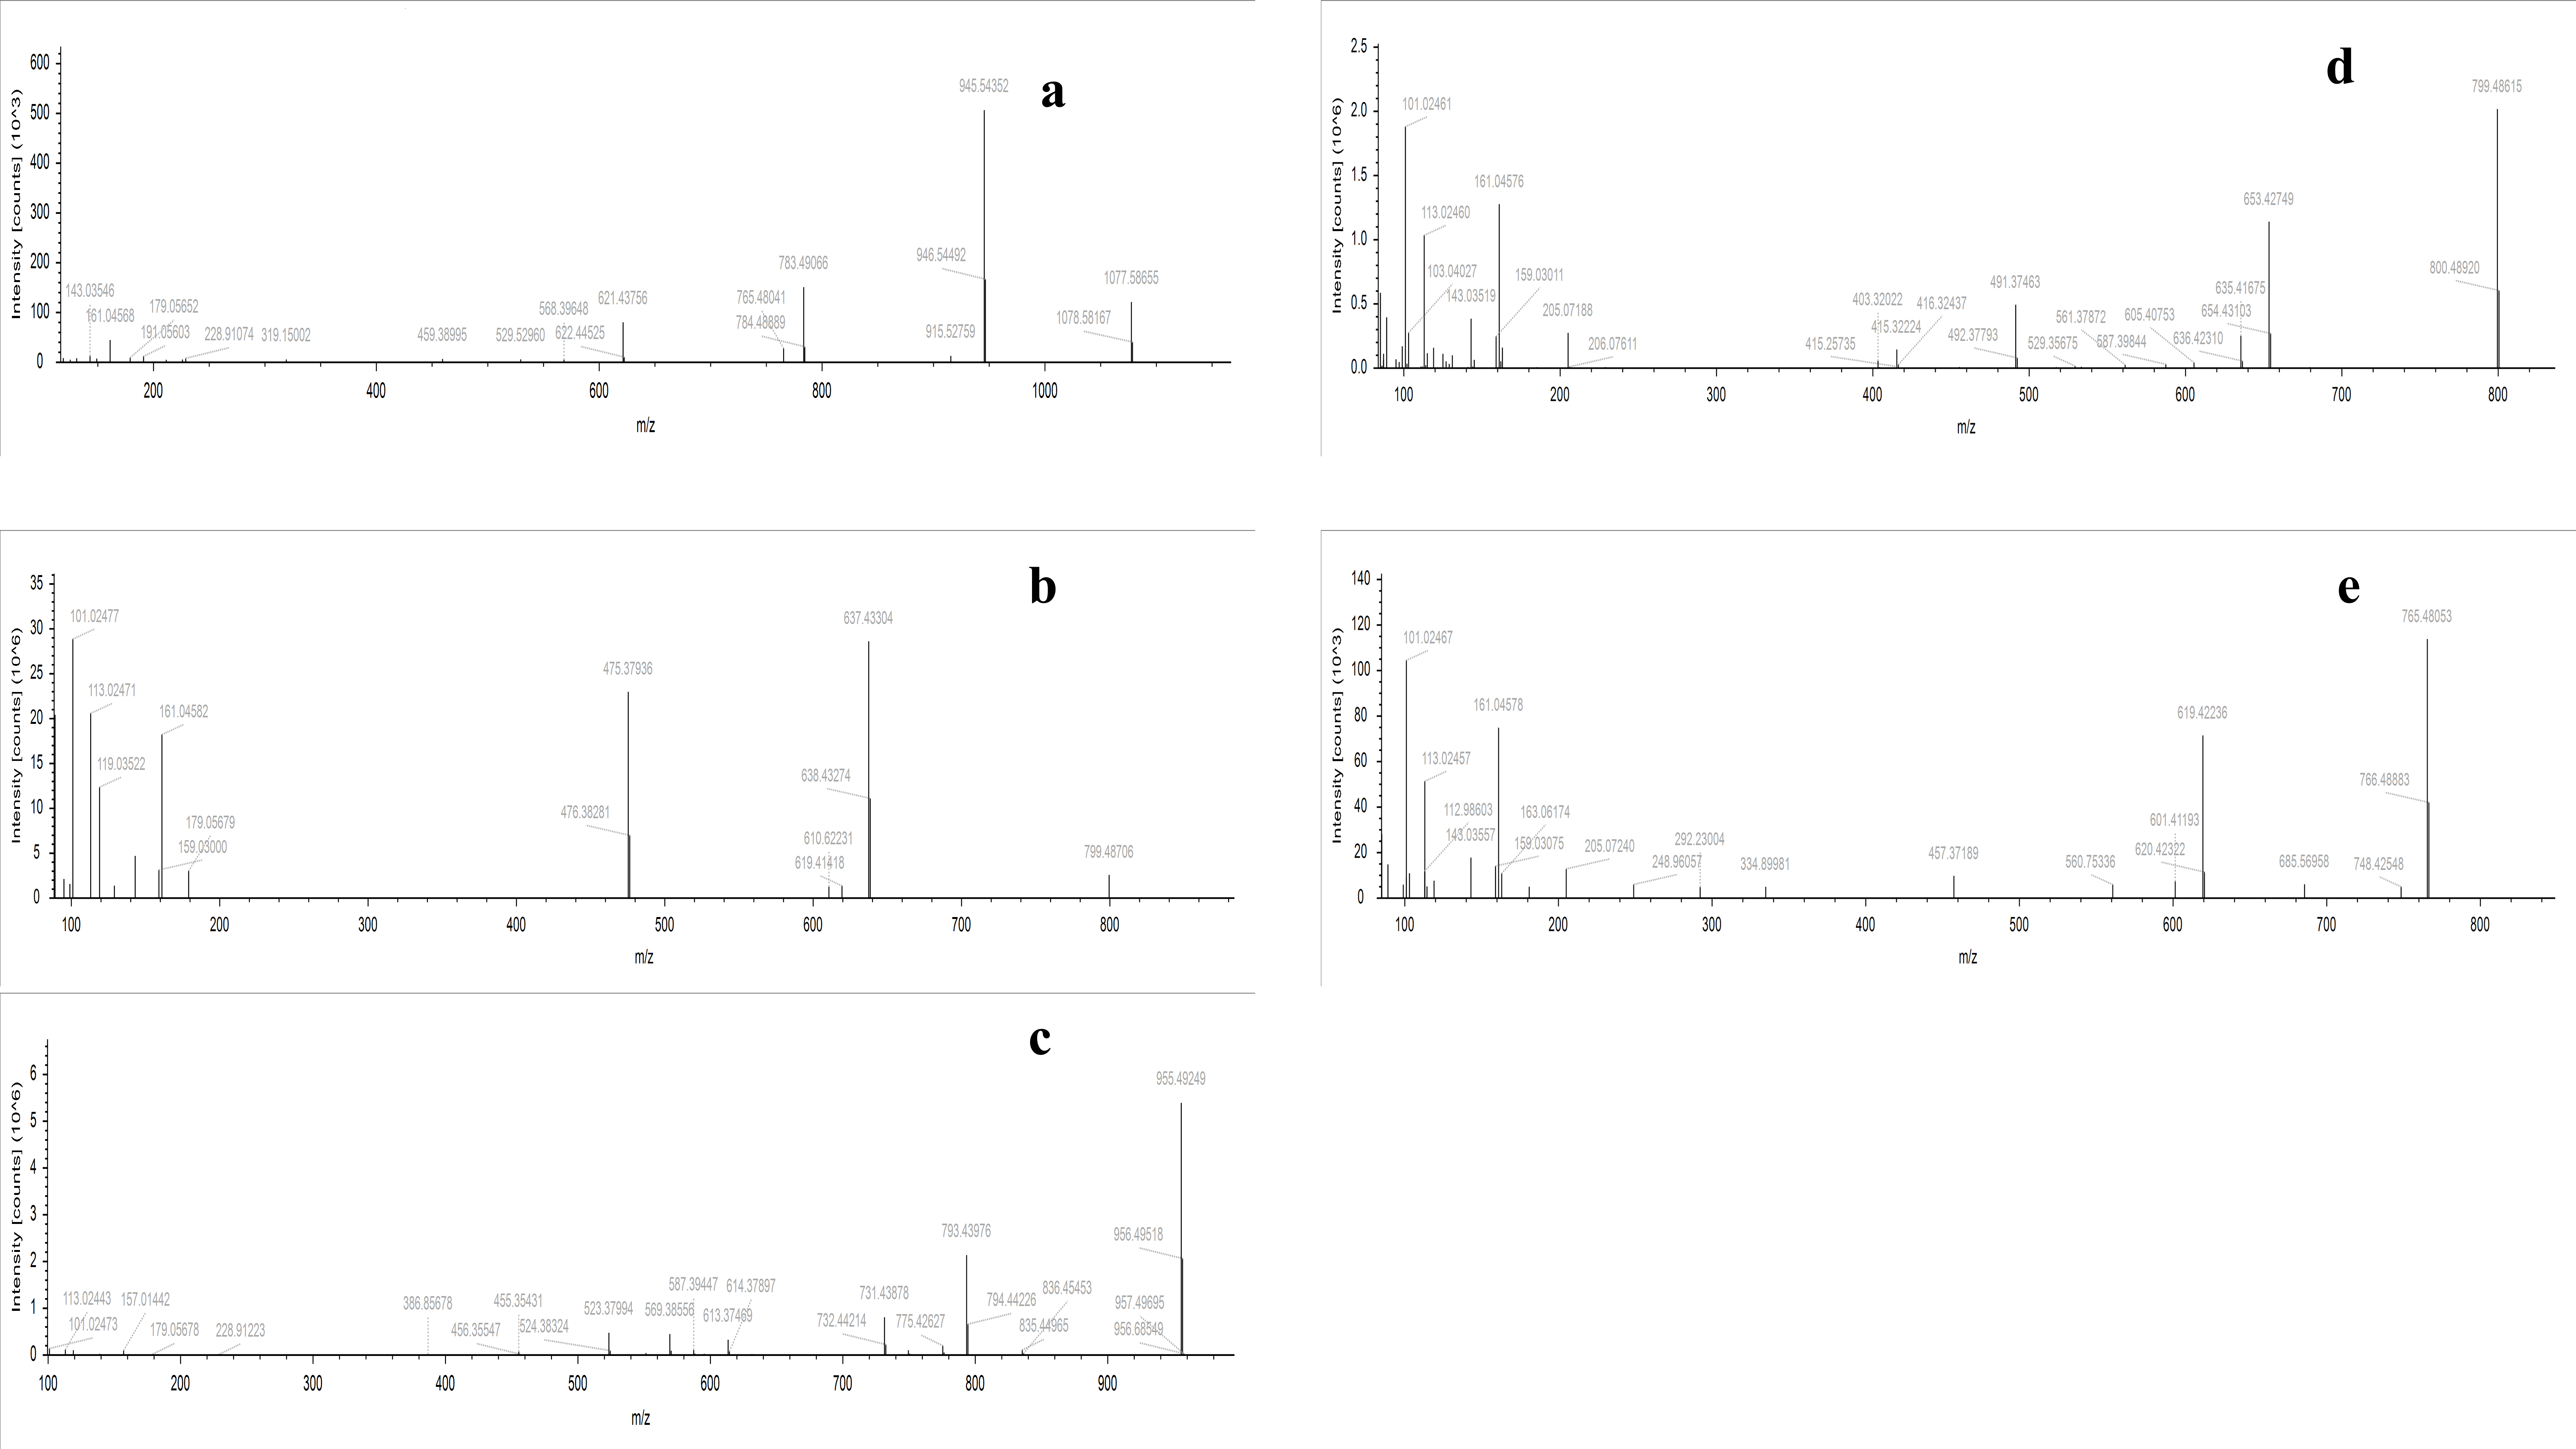


**Fig.S6** The MS2 spectrum of some compounds in Four Panax species. .**a**:Protopanaxadiol，**b**:Protopanaxatriol, **c**:Oleanolic acid,**d**:Octillol,**e**:C17 side-chain varied

**Table S1** Souce information of SQ, BSQ, XYS, RS.

| Sample name | Name | Origin | Sample name | Name | Origin |
| --- | --- | --- | --- | --- | --- |
| SQ-1 | Panax notoginseng | Yunnan | XYS-1 | Panax quinquefolius | Jilin |
| SQ-2 | Panax notoginseng | Yunnan | XYS-2 | Panax quinquefolius | Jilin |
| SQ-3 | Panax notoginseng | Yunnan | XYS-3 | Panax quinquefolius | Canada |
| SQ-4 | Panax notoginseng | Yunnan | XYS-4 | Panax quinquefolius | Canada |
| SQ-5 | Panax notoginseng | Yunnan | XYS-5 | Panax quinquefolius | Jilin |
| SQ-6 | Panax notoginseng | Yunnan | XYS-6 | Panax quinquefolius | Jilin |
| SQ-7 | Panax notoginseng | Yunnan | XYS-7 | Panax quinquefolius | Canada |
| SQ-8 | Panax notoginseng | Yunnan | XYS-8 | Panax quinquefolius | Canada |
| SQ-9 | Panax notoginseng | Yunnan | XYS-9 | Panax quinquefolius | Jilin |
| SQ-10 | Panax notoginseng | Yunnan | XYS-10 | Panax quinquefolius | Canada |
| BSQ-1 | Panax japonicus | Yunnan | RS-1 | Panax ginseng | Jilin |
| BSQ-2 | Panax japonicus | Yunnan | RS-2 | Panax ginseng | Jilin |
| BSQ-3 | Panax japonicus | Yunnan | RS-3 | Panax ginseng | Jilin |
| BSQ-4 | Panax japonicus | Yunnan | RS-4 | Panax ginseng | Jilin |
| BSQ-5 | Panax japonicus | Yunnan | RS-5 | Panax ginseng | Jilin |
| BSQ-6 | Panax japonicus | Hunan | RS-6 | Panax ginseng | Jilin |
| BSQ-7 | Panax japonicus | Hunan | RS-7 | Panax ginseng | Jilin |
| BSQ-8 | Panax japonicus | Hunan | RS-8 | Panax ginseng | Jilin |
| BSQ-9 | Panax japonicus | Hubei | RS-9 | Panax ginseng | Jilin |
| BSQ-10 | Panax japonicus | Hubei | RS-10 | Panax ginseng | Jilin |
| BSQ-11 | Panax japonicus | Hubei |  |  |  |

**Table S2** Method validation of HPLC fingerprint analysis

| Analytes | RSD (%) | Precision | Repeatability | Stability |
| --- | --- | --- | --- | --- |
| **1** | RRT | 0.34 | 4.11 | 0.49 |
| RPA | 2.17 | 2.88 | 2.3 |
| **2** | RRT | 0.18 | 2.11 | 0.27 |
| RPA | 0.34 | 2.82 | 0.78 |
| **3** | RRT | 0.16 | 1.83 | 0.23 |
| RPA | 0.42 | 0.43 | 0.81 |
| **4** | RRT | 0.09 | 0.87 | 0.06 |
| RPA | 0.21 | 2.48 | 0.95 |
| **5** | RRT | 0.61 | 0.69 | 0.07 |
| RPA | 1.43 | 2.75 | 1.61 |
| **6** | RRT | 0.07 | 0.6 | 0.06 |
| RPA | 0.59 | 2.05 | 0.85 |
| **7** | RRT | 0.09 | 0.7 | 0.00 |
| RPA | 2.55 | 2.6 | 3.3 |
| **8** | RRT | 0.08 | 0.66 | 0.06 |
| RPA | 1.48 | 2.68 | 3.19 |
| **9** | RRT | 0.07 | 0.62 | 0.05 |
| RPA | 0.35 | 2.46 | 1.01 |
| **10** | RRT | 0.08 | 0.69 | 0.06 |
| RPA | 0.44 | 1.88 | 2.55 |
| **11** | RRT | 0.07 | 0.63 | 0.05 |
| RPA | 0.17 | 1.98 | 1.29 |
| **12** | RRT | 0.01 | 0.06 | 0.00 |
| RPA | 0.37 | 1.1 | 0.82 |
| **13** | RRT | 0.00 | 0.03 | 0.00 |
| RPA | 0.31 | 1.56 | 0.9 |

**Table S3** Similarity in fingerprints of XYS.

| NO. | XYS-1 | XYS-2 | XYS-3 | XYS-4 | XYS-5 | XYS-6 | XYS-7 | XYS-8 | XYS-9 | XYS-10 | Contrast |
| --- | --- | --- | --- | --- | --- | --- | --- | --- | --- | --- | --- |
| XYS-1 | 1 | 0.942 | 0.944 | 0.99 | 0.987 | 0.986 | 0.905 | 0.964 | 0.972 | 0.939 | 0.91 |
| XYS-2 | 0.942 | 1 | 0.955 | 0.979 | 0.919 | 0.939 | 0.963 | 0.999 | 0.986 | 0.904 | 0.991 |
| XYS-3 | 0.944 | 0.955 | 1 | 0.997 | 0.923 | 0.939 | 0.93 | 0.934 | 0.921 | 0.919 | 0.928 |
| XYS-4 | 0.99 | 0.979 | 0.997 | 1 | 0.926 | 0.938 | 0.964 | 0.995 | 0.927 | 0.944 | 0.958 |
| XYS-5 | 0.987 | 0.919 | 0.923 | 0.926 | 1 | 0.984 | 0.936 | 0.96 | 0.945 | 0.938 | 0.934 |
| XYS-6 | 0.986 | 0.939 | 0.939 | 0.938 | 0.984 | 1 | 0.939 | 0.978 | 0.972 | 0.969 | 0.948 |
| XYS-7 | 0.905 | 0.963 | 0.93 | 0.964 | 0.936 | 0.939 | 1 | 0.961 | 0.991 | 0.987 | 0.941 |
| XYS-8 | 0.964 | 0.999 | 0.934 | 0.995 | 0.96 | 0.978 | 0.961 | 1 | 0.943 | 0.907 | 0.954 |
| XYS-9 | 0.972 | 0.986 | 0.921 | 0.927 | 0.945 | 0.972 | 0.991 | 0.943 | 1 | 0.97 | 0.925 |
| XYS-10 | 0.939 | 0.904 | 0.919 | 0.944 | 0.938 | 0.969 | 0.987 | 0.907 | 0.97 | 1 | 0.955 |
| Contrast | 0.91 | 0.991 | 0.928 | 0.958 | 0.934 | 0.948 | 0.941 | 0.954 | 0.925 | 0.955 | 1 |

**Table S4** Similarity in fingerprints of RS.

| NO. | RS-1 | RS-2 | RS-3 | RS-4 | RS-5 | RS-6 | RS-7 | RS-8 | RS-9 | Contrast |
| --- | --- | --- | --- | --- | --- | --- | --- | --- | --- | --- |
| RS-1 | 1 | 0.971 | 0.987 | 0.986 | 0.974 | 0.942 | 0.962 | 0.927 | 0.93 | 0.985 |
| RS-2 | 0.971 | 1 | 0.972 | 0.971 | 0.917 | 0.957 | 0.921 | 0.96 | 0.91 | 0.985 |
| RS-3 | 0.987 | 0.972 | 1 | 1 | 0.92 | 0.975 | 0.928 | 0.918 | 0.987 | 0.974 |
| RS-4 | 0.986 | 0.971 | 1 | 1 | 0.916 | 0.976 | 0.926 | 0.916 | 0.985 | 0.972 |
| RS-5 | 0.974 | 0.917 | 0.92 | 0.916 | 1 | 0.922 | 0.965 | 0.914 | 0.931 | 0.957 |
| RS-6 | 0.942 | 0.957 | 0.975 | 0.976 | 0.628 | 1 | 0.947 | 0.966 | 0.994 | 0.926 |
| RS-7 | 0.962 | 0.921 | 0.928 | 0.926 | 0.965 | 0.947 | 1 | 0.938 | 0.987 | 0.973 |
| RS-8 | 0.927 | 0.96 | 0.918 | 0.916 | 0.914 | 0.966 | 0.938 | 1 | 0.957 | 0.976 |
| RS-9 | 0.93 | 0.91 | 0.987 | 0.985 | 0.931 | 0.994 | 0.987 | 0.957 | 1 | 0.963 |
| Contrast | 0.985 | 0.985 | 0.974 | 0.972 | 0.957 | 0.926 | 0.973 | 0.976 | 0.963 | 1 |

**Table S5** Similarity in fingerprints of SQ.

| NO. | SQ-1 | SQ-2 | SQ-3 | SQ-4 | SQ-5 | SQ-6 | SQ-7 | SQ-8 | SQ-9 | SQ-10 | Contrast |
| --- | --- | --- | --- | --- | --- | --- | --- | --- | --- | --- | --- |
| SQ-1 | 1 | 0.923 | 0.979 | 0.931 | 0.908 | 0.934 | 0.938 | 0.941 | 0.937 | 0.932 | 0.955 |
| SQ-2 | 0.923 | 1 | 0.982 | 0.965 | 0.987 | 0.993 | 0.948 | 0.929 | 0.937 | 0.931 | 0.983 |
| SQ-3 | 0.979 | 0.982 | 1 | 0.951 | 0.992 | 0.978 | 0.989 | 0.982 | 0.982 | 0.988 | 0.954 |
| SQ-4 | 0.931 | 0.965 | 0.951 | 1 | 0.98 | 0.979 | 0.958 | 0.952 | 0.962 | 0.961 | 0.988 |
| SQ-5 | 0.908 | 0.987 | 0.992 | 0.98 | 1 | 0.99 | 0.927 | 0.92 | 0.922 | 0.925 | 0.978 |
| SQ-6 | 0.934 | 0.993 | 0.978 | 0.979 | 0.99 | 1 | 0.955 | 0.95 | 0.947 | 0.952 | 0.991 |
| SQ-7 | 0.938 | 0.948 | 0.989 | 0.958 | 0.927 | 0.955 | 1 | 0.972 | 0.99 | 0.974 | 0.98 |
| SQ-8 | 0.941 | 0.929 | 0.982 | 0.952 | 0.92 | 0.95 | 0.972 | 1 | 0.975 | 0.992 | 0.975 |
| SQ-9 | 0.937 | 0.937 | 0.982 | 0.962 | 0.922 | 0.947 | 0.99 | 0.975 | 1 | 0.981 | 0.978 |
| SQ-10 | 0.932 | 0.931 | 0.988 | 0.961 | 0.925 | 0.952 | 0.974 | 0.992 | 0.981 | 1 | 0.977 |
| Contrast | 0.955 | 0.983 | 0.954 | 0.988 | 0.978 | 0.991 | 0.98 | 0.975 | 0.978 | 0.977 | 1 |

**Table S6** Similarity in fingerprints of BSQ.

| NO. | BSQ-1 | BSQ-2 | BSQ-3 | BSQ-4 | BSQ-5 | BSQ-6 | BSQ-7 | BSQ-8 | BSQ-9 | BSQ-10 | BSQ-11 | Contrast |
| --- | --- | --- | --- | --- | --- | --- | --- | --- | --- | --- | --- | --- |
| BSQ-1 | 1 | 0.917 | 0.934 | 0.95 | 0.973 | 0.925 | 0.921 | 0.931 | 0.976 | 0.911 | 0.965 | 0.967 |
| BSQ-2 | 0.917 | 1 | 0.919 | 0.964 | 0.953 | 0.94 | 0.936 | 0.911 | 0.965 | 0.987 | 0.935 | 0.989 |
| BSQ-3 | 0.934 | 0.919 | 1 | 0.936 | 0.914 | 0.966 | 0.965 | 0.951 | 0.935 | 0.966 | 0.925 | 0.925 |
| BSQ-4 | 0.95 | 0.964 | 0.936 | 1 | 0.998 | 0.995 | 0.993 | 0.989 | 0.951 | 0.984 | 0.936 | 0.946 |
| BSQ-5 | 0.973 | 0.953 | 0.914 | 0.998 | 1 | 0.972 | 0.979 | 0.906 | 0.942 | 0.96 | 0.908 | 0.962 |
| BSQ-6 | 0.925 | 0.94 | 0.966 | 0.995 | 0.972 | 1 | 0.993 | 0.974 | 0.979 | 0.987 | 0.971 | 0.983 |
| BSQ-7 | 0.921 | 0.936 | 0.965 | 0.993 | 0.979 | 0.993 | 1 | 0.969 | 0.98 | 0.984 | 0.961 | 0.981 |
| BSQ-8 | 0.931 | 0.911 | 0.951 | 0.989 | 0.906 | 0.974 | 0.969 | 1 | 0.951 | 0.956 | 0.928 | 0.978 |
| BSQ-9 | 0.976 | 0.965 | 0.935 | 0.951 | 0.942 | 0.979 | 0.98 | 0.951 | 1 | 0.99 | 0.983 | 0.961 |
| BSQ-10 | 0.911 | 0.987 | 0.966 | 0.984 | 0.96 | 0.987 | 0.984 | 0.956 | 0.99 | 1 | 0.987 | 0.976 |
| BSQ-11 | 0.965 | 0.935 | 0.925 | 0.936 | 0.908 | 0.971 | 0.961 | 0.928 | 0.983 | 0.987 | 1 | 0.948 |
| Contrast | 0.967 | 0.989 | 0.925 | 0.946 | 0.962 | 0.983 | 0.981 | 0.978 | 0.961 | 0.976 | 0.948 | 1 |

**Table S7** Content of 13 Compounds in Four Panax Medicinal Herbs

| NO. | notoginsenoside R1 | ginsenoside Rg1 | ginsenoside Re | ginsenoside Rb1 | ginsenoside Rc | ginsenoside Ro | ginsenoside Rb2 | ginsenoside Rb3 | chikusetsusaponin IV | ginsenoside Rd | chikusetsusaponin IVa | panaxydol | panaxynol |
| --- | --- | --- | --- | --- | --- | --- | --- | --- | --- | --- | --- | --- | --- |
| SQ1 | 8.23 | 28.57 | 4.36 | 26.70 | ND | ND | ND | ND | ND | 6.96 | ND | 1.23 | 0.01 |
| SQ2 | 6.33 | 29.84 | 4.25 | 24.59 | ND | ND | ND | ND | ND | 5.99 | ND | 1.37 | 0.04 |
| SQ3 | 7.15 | 25.43 | 3.45 | 24.07 | ND | ND | ND | ND | ND | 5.37 | ND | 1.51 | 0.26 |
| SQ4 | 8.60 | 28.55 | 4.49 | 28.10 | ND | ND | ND | ND | ND | 6.74 | ND | 0.86 | 0.85 |
| SQ5 | 7.49 | 25.13 | 3.88 | 23.97 | ND | ND | ND | ND | ND | 5.21 | ND | 1.27 | 0.43 |
| SQ6 | 9.30 | 28.52 | 3.72 | 28.47 | ND | ND | ND | ND | ND | 6.49 | ND | 1.37 | 0.08 |
| SQ7 | 8.37 | 35.67 | 4.31 | 27.35 | ND | ND | ND | ND | ND | 7.69 | ND | 1.64 | 0.06 |
| SQ8 | 7.87 | 23.50 | 6.67 | 28.40 | ND | ND | ND | ND | ND | 4.95 | ND | 0.80 | 0.01 |
| SQ9 | 8.12 | 39.96 | 3.82 | 34.80 | ND | ND | ND | ND | ND | 10.11 | ND | 0.55 | 0.03 |
| SQ10 | 6.97 | 27.19 | 5.73 | 34.00 | ND | ND | ND | ND | ND | 8.89 | ND | 1.11 | 0.07 |
| BSQ1 | ND | 2.87 | 0.35 | 87.06 | ND | 9.61 | ND | ND | 13.46 | 4.24 | 3.52 | 0.20 | 0.98 |
| BSQ2 | ND | 1.60 | 0.37 | 53.86 | ND | 4.70 | ND | ND | 11.32 | 1.74 | 1.38 | 0.06 | 0.47 |
| BSQ3 | ND | 2.88 | 0.26 | 53.48 | ND | 8.64 | ND | ND | 9.77 | 3.68 | 3.04 | 0.06 | 0.24 |
| BSQ4 | ND | 2.68 | 0.41 | 80.22 | ND | 6.28 | ND | ND | 16.40 | 1.87 | 2.07 | 0.07 | 0.56 |
| BSQ5 | ND | 2.92 | 0.23 | 46.89 | ND | 13.44 | ND | ND | 9.51 | 4.84 | 4.03 | 0.24 | 1.11 |
| BSQ6 | ND | 2.04 | 5.61 | 85.60 | ND | 2.63 | ND | ND | 35.35 | 0.69 | 0.48 | 0.44 | 0.03 |
| BSQ7 | ND | 3.40 | 5.05 | 66.35 | ND | 3.44 | ND | ND | 31.26 | 1.86 | 1.48 | 0.56 | 0.09 |
| BSQ8 | ND | 5.04 | 7.30 | 78.58 | ND | 4.27 | ND | ND | 31.23 | 1.23 | 9.31 | 3.15 | 0.86 |
| BSQ9 | ND | 3.50 | 7.50 | 74.26 | ND | 3.04 | ND | ND | 37.70 | 0.41 | 8.04 | 2.72 | 0.42 |
| BSQ10 | ND | 2.40 | 3.59 | 78.84 | ND | 1.46 | ND | ND | 32.64 | 0.53 | 11.86 | 4.01 | 0.14 |
| BSQ11 | ND | 2.16 | 3.20 | 89.58 | ND | 1.46 | ND | ND | 38.04 | 0.44 | 5.60 | 1.90 | 0.05 |
| XYS1 | ND | 0.97 | 15.10 | 34.84 | 2.30 | 4.16 | 1.36 | 1.74 | ND | 6.52 | ND | 2.79 | 0.04 |
| XYS2 | ND | 0.84 | 12.02 | 34.84 | 0.62 | 5.22 | 1.33 | 1.35 | ND | 3.58 | ND | 0.76 | 0.31 |
| XYS3 | ND | 2.21 | 20.06 | 43.73 | 1.10 | 13.40 | 1.76 | 4.18 | ND | 10.09 | ND | 2.07 | 0.67 |
| XYS4 | ND | 1.60 | 19.33 | 39.57 | 2.04 | 6.63 | 1.40 | 1.81 | ND | 6.41 | ND | 1.46 | 0.06 |
| XYS5 | ND | 1.44 | 15.80 | 25.18 | 3.34 | 4.35 | 1.83 | 2.34 | ND | 4.04 | ND | 0.96 | 0.23 |
| XYS6 | ND | 0.96 | 12.68 | 26.80 | 0.52 | 4.68 | 1.07 | 1.05 | ND | 3.04 | ND | 0.94 | 0.36 |
| XYS7 | ND | 0.65 | 16.97 | 30.02 | ND | 9.93 | 0.72 | 0.00 | ND | 2.60 | ND | 1.14 | 0.02 |
| XYS8 | ND | 1.50 | 23.44 | 30.22 | 0.21 | 4.50 | 1.14 | 0.66 | ND | 2.60 | ND | 3.21 | 0.01 |
| XYS9 | ND | 0.27 | 7.64 | 26.69 | 0.45 | 2.26 | 1.45 | 0.63 | ND | 3.91 | ND | 0.68 | 0.03 |
| XYS10 | ND | 0.57 | 13.56 | 34.84 | 3.95 | 9.88 | 1.78 | 1.14 | ND | 3.32 | ND | 2.23 | 0.03 |
| RS1 | ND | 1.52 | 18.65 | 16.89 | 3.57 | 9.86 | 4.41 | 4.11 | ND | 4.95 | ND | 4.42 | 0.24 |
| RS2 | ND | 1.46 | 15.70 | 33.56 | 3.06 | 4.64 | 1.33 | 2.23 | ND | 6.66 | ND | 1.83 | 0.31 |
| RS3 | ND | 1.43 | 16.49 | 34.47 | 2.29 | 4.86 | 0.81 | 1.79 | ND | 4.63 | ND | 2.53 | 0.12 |
| RS4 | ND | 1.46 | 16.97 | 36.51 | 2.36 | 5.23 | 0.83 | 1.82 | ND | 4.92 | ND | 2.54 | 0.10 |
| RS5 | ND | 0.89 | 12.24 | 32.54 | 1.03 | 5.39 | 0.62 | 1.10 | ND | 4.44 | ND | 1.33 | 0.03 |
| RS6 | ND | 0.81 | 11.35 | 17.54 | 0.03 | 5.32 | 2.19 | 1.23 | ND | 2.74 | ND | 1.52 | 0.93 |
| RS7 | ND | 0.74 | 9.15 | 14.91 | 0.56 | 3.87 | 2.44 | 1.05 | ND | 1.72 | ND | 0.87 | 0.01 |
| RS8 | ND | 1.99 | 10.04 | 7.86 | 2.27 | 12.19 | 4.56 | 6.11 | ND | 2.80 | ND | 1.50 | 1.41 |
| RS9 | ND | 1.79 | 10.49 | 9.83 | 2.50 | 12.69 | 5.49 | 6.61 | ND | 2.49 | ND | 1.89 | 0.08 |
| RS10 | ND | 0.92 | 13.95 | 20.36 | 0.01 | 12.33 | 4.31 | 2.69 | ND | 3.30 | ND | 1.18 | 0.44 |

Note: ND indicates not detecte
